# Supplementary material for: KSR1- and ERK-dependent translational regulation of the epithelial-to-mesenchymal transition
Source: eLife. 2021 May 10;10:e66608. doi: 10.7554/eLife.66608 (PMC8195604; doi:10.7554/eLife.66608)
Supplement: Source data 1. [file elife-66608-data1.xlsx]

## Sheet: Table1
Gene.stable.ID	Gene_Symbol	translatedmRNA.apvEff	translatedmRNA.apvPAdj	totalmRNA.apvEff	totalmRNA.apvPAdj	translation.apvEff	apvEff	apvRvmP	translation.apvPAdj	buffering.apvEff	buffering.apvAdj	singleRegMode	Gene.description
ENSG00000199691	RN7SKP173	-1.59203	0.999861	0.900469	0.999977	-2.11522	-2.11522	0.0105262	0.999754	1.52824	0.999977	translation	RN7SK pseudogene 173 [Source:HGNC Symbol;Acc:HGNC:45897]
ENSG00000286122	AC016074.2	-0.99721	0.999861	0.88956	0.999977	-1.92782	-1.92782	0.0222994	0.999754	1.74167	0.999977	translation	novel transcript
ENSG00000173486	FKBP2	-1.09256	0.999861	0.683367	0.999977	-1.62511	-1.62511	0.000661038	0.999754	1.68032	0.999977	translation	FKBP prolyl isomerase 2 [Source:HGNC Symbol;Acc:HGNC:3718]
ENSG00000259439	RP11-89K21.1	-0.595897	0.999861	1.03946	0.999977	-1.60948	-1.60948	0.0133174	0.999754	1.53216	0.999977	translation	long intergenic non-protein coding RNA 1833 [Source:HGNC Symbol;Acc:HGNC:52644]
ENSG00000120820	GLT8D2	-0.764138	0.999861	1.02981	0.999977	-1.52775	-1.52775	0.0257782	0.999754	1.86438	0.999977	translation	glycosyltransferase 8 domain containing 2 [Source:HGNC Symbol;Acc:HGNC:24890]
ENSG00000287401	AC034139.1	-0.810603	0.999861	0.679554	0.999977	-1.41424	-1.41424	0.041679	0.999754	1.43225	0.999977	translation	novel transcript, antisense to STBD1and FAM47E
ENSG00000133106	EPSTI1	-0.631903	0.999861	1.79364	0.999977	-1.40484	-1.40484	0.00365629	0.999754	2.52031	0.999977	translation	epithelial stromal interaction 1 [Source:HGNC Symbol;Acc:HGNC:16465]
ENSG00000020633	RUNX3	-1.25005	0.999861	0.155583	0.999977	-1.38843	-1.38843	0.0241003	0.999754	1.47706	0.999977	translation	RUNX family transcription factor 3 [Source:HGNC Symbol;Acc:HGNC:10473]
ENSG00000262185	RP11-462G12.1	-0.504743	0.999861	1.07694	0.999977	-1.37949	-1.37949	0.00847085	0.999754	1.55965	0.999977	translation	long intergenic non-protein coding RNA 2861 [Source:HGNC Symbol;Acc:HGNC:54406]
ENSG00000110318	KIAA1377	-0.691299	0.999861	0.742738	0.999977	-1.26311	-1.26311	0.0254887	0.999754	1.45218	0.999977	translation	centrosomal protein 126 [Source:HGNC Symbol;Acc:HGNC:29264]
ENSG00000225889	AC074289.1	-1.32562	0.999861	-0.322005	0.999977	-1.25951	-1.25951	0.00976027	0.999754	-0.0530847	0.999977	translation	novel transcript, antisense to PELI1
ENSG00000170681	MURC	-0.607583	0.999861	0.997489	0.999977	-1.24551	-1.24551	0.00623716	0.999754	1.78596	0.999977	translation	caveolae associated protein 4 [Source:HGNC Symbol;Acc:HGNC:33742]
ENSG00000260400	RP11-119F7.5	-0.189857	0.999861	1.29607	0.999977	-1.24276	-1.24276	0.0143565	0.999754	1.50102	0.999977	translation	novel transcript, overlapping to TET1
ENSG00000143816	WNT9A	-0.70408	0.999861	0.575152	0.999977	-1.23082	-1.23082	0.0258682	0.999754	1.29032	0.999977	translation	Wnt family member 9A [Source:HGNC Symbol;Acc:HGNC:12778]
ENSG00000255992	RP11-417L19.4	-1.0469	0.999861	0.97606	0.999977	-1.20771	-1.20771	0.0180544	0.999754	1.28681	0.999977	translation	novel transcript
ENSG00000164082	GRM2	-1.21959	0.999861	-0.830832	0.999977	-1.19239	-1.19239	0.0206534	0.999754	-0.687684	0.999977	translation	glutamate metabotropic receptor 2 [Source:HGNC Symbol;Acc:HGNC:4594]
ENSG00000198719	DLL1	-0.716474	0.999861	0.598377	0.999977	-1.17705	-1.17705	0.0107318	0.999754	1.30084	0.999977	translation	delta like canonical Notch ligand 1 [Source:HGNC Symbol;Acc:HGNC:2908]
ENSG00000268912	CTD-2619J13.17	-1.1585	0.999861	-0.271699	0.999977	-1.12141	-1.12141	0.00437645	0.999754	0.0583681	0.999977	translation	novel transcript
ENSG00000128482	RNF112	-0.783234	0.999861	0.581843	0.999977	-1.02747	-1.02747	0.0112364	0.999754	1.53525	0.999977	translation	ring finger protein 112 [Source:HGNC Symbol;Acc:HGNC:12968]
ENSG00000253187	HOXA10-AS	-0.637786	0.999861	0.463969	0.999977	-1.02131	-1.02131	0.00691426	0.999754	1.09219	0.999977	translation	HOXA10 antisense RNA [Source:HGNC Symbol;Acc:HGNC:40281]
ENSG00000037965	HOXC8	-0.963651	0.999861	0.0078796	0.999977	-1.01721	-1.01721	0.0233234	0.999754	-0.976518	0.999977	translation	homeobox C8 [Source:NCBI gene;Acc:3224]
ENSG00000285018	AC245140.3	-0.640584	0.999861	0.813614	0.999977	-1.00919	-1.00919	0.0315249	0.999754	1.15317	0.999977	translation	novel transcript, antisense to FLNA
ENSG00000070601	FRMPD1	-0.739192	0.999861	0.587207	0.999977	-0.994796	-0.994796	0.0204109	0.999754	1.54199	0.999977	translation	FERM and PDZ domain containing 1 [Source:HGNC Symbol;Acc:HGNC:29159]
ENSG00000125872	LRRN4	-0.684873	0.999861	0.331663	0.999977	-0.948592	-0.948592	0.0115648	0.999754	1.09979	0.999977	translation	leucine rich repeat neuronal 4 [Source:HGNC Symbol;Acc:HGNC:16208]
ENSG00000197467	COL13A1	-0.634989	0.999861	0.287544	0.999977	-0.93162	-0.93162	0.005897	0.999754	0.813365	0.999977	translation
ENSG00000268583	CTC-453G23.8	-0.75804	0.999861	0.64931	0.999977	-0.925847	-0.925847	0.00440875	0.999754	1.46132	0.999977	translation	novel transcript, antisense to CARD8
ENSG00000155093	PTPRN2	-0.343812	0.999861	0.670656	0.999977	-0.919824	-0.919824	0.00291748	0.999754	1.05036	0.999977	translation	protein tyrosine phosphatase receptor type N2 [Source:HGNC Symbol;Acc:HGNC:9677]
ENSG00000278616	BEND3P3	-0.772836	0.999861	0.629911	0.999977	-0.91231	-0.91231	0.0106438	0.999754	1.64084	0.999977	translation	BEN domain containing 3 pseudogene 3 [Source:HGNC Symbol;Acc:HGNC:45016]
ENSG00000261490	RP11-448G15.3	-0.854175	0.999861	0.271767	0.999977	-0.905898	-0.905898	0.0222942	0.999754	1.37081	0.999977	translation	novel transcript, overlapping WDR1
ENSG00000210049	MT-TF	-0.21923	0.999861	0.454333	0.999977	-0.898581	-0.898581	0.0220672	0.999754	0.587223	0.999977	translation	mitochondrially encoded tRNA-Phe (UUU/C) [Source:HGNC Symbol;Acc:HGNC:7481]
ENSG00000011028	MRC2	-1.00611	0.999861	-0.590156	0.999977	-0.884136	-0.884136	0.0250392	0.999754	-0.105794	0.999977	translation	mannose receptor C type 2 [Source:HGNC Symbol;Acc:HGNC:16875]
ENSG00000169860	P2RY1	-1.00115	0.999861	-0.242839	0.999977	-0.873495	-0.873495	0.0190791	0.999754	1.08912	0.999977	translation	purinergic receptor P2Y1 [Source:HGNC Symbol;Acc:HGNC:8539]
ENSG00000168282	MGAT2	-0.499304	0.999861	0.602234	0.999977	-0.868089	-0.868089	0.0228113	0.999754	0.978061	0.999977	translation	alpha-1,6-mannosyl-glycoprotein 2-beta-N-acetylglucosaminyltransferase [Source:HGNC Symbol;Acc:HGNC:7045]
ENSG00000143355	LHX9	-0.807614	0.999861	0.224531	0.999977	-0.864379	-0.864379	0.0121787	0.999754	1.22053	0.999977	translation	LIM homeobox 9 [Source:HGNC Symbol;Acc:HGNC:14222]
ENSG00000104643	MTMR9	-0.717801	0.999861	0.495667	0.999977	-0.821179	-0.821179	0.030426	0.999754	0.752603	0.999977	translation	myotubularin related protein 9 [Source:HGNC Symbol;Acc:HGNC:14596]
ENSG00000036672	USP2	-0.117435	0.999861	0.81022	0.999977	-0.811722	-0.811722	0.0113046	0.999754	0.938176	0.999977	translation	ubiquitin specific peptidase 2 [Source:HGNC Symbol;Acc:HGNC:12618]
ENSG00000119917	IFIT3	-0.252216	0.999861	1.08944	0.999977	-0.808722	-0.808722	0.0212959	0.999754	1.48648	0.999977	translation	interferon induced protein with tetratricopeptide repeats 3 [Source:HGNC Symbol;Acc:HGNC:5411]
ENSG00000270001	RP11-218C14.8	-0.706889	0.999861	0.282709	0.999977	-0.789319	-0.789319	0.00504223	0.999754	1.72736	0.999977	translation	novel transcript
ENSG00000118777	ABCG2	-0.712863	0.999861	-0.398679	0.999977	-0.764955	-0.764955	0.00918365	0.999754	-0.615854	0.999977	translation	ATP binding cassette subfamily G member 2 (Junior blood group) [Source:HGNC Symbol;Acc:HGNC:74]
ENSG00000122877	EGR2	-0.587829	0.999861	0.302189	0.999977	-0.763466	-0.763466	0.0153414	0.999754	1.07949	0.999977	translation	early growth response 2 [Source:HGNC Symbol;Acc:HGNC:3239]
ENSG00000213331	RP11-713C19.2	-0.712578	0.999861	-0.21951	0.999977	-0.762225	-0.762225	0.0337767	0.999754	-0.681419	0.999977	translation	peroxiredoxin 6 (PRDX6) pseudogene
ENSG00000198939	ZFP2	-0.589002	0.999861	0.865238	0.999977	-0.748684	-0.748684	0.00889647	0.999754	2.17274	0.999977	translation	ZFP2 zinc finger protein [Source:HGNC Symbol;Acc:HGNC:26138]
ENSG00000108551	RASD1	-0.458563	0.999861	0.440879	0.999977	-0.727155	-0.727155	0.024515	0.999754	1.04601	0.999977	translation	ras related dexamethasone induced 1 [Source:HGNC Symbol;Acc:HGNC:15828]
ENSG00000250508	RP11-757G1.6	-0.434955	0.999861	1.19954	0.999977	-0.701122	-0.701122	0.0315178	0.999754	2.0019	0.999977	translation	long intergenic non-protein coding RNA 2701 [Source:HGNC Symbol;Acc:HGNC:54216]
ENSG00000185261	KIAA0825	-0.10938	0.999861	0.989869	0.999977	-0.695595	-0.695595	0.0144602	0.999754	1.14926	0.999977	translation	KIAA0825 [Source:HGNC Symbol;Acc:HGNC:28532]
ENSG00000112320	SOBP	-0.435339	0.999861	0.470326	0.999977	-0.691996	-0.691996	0.0353668	0.999754	0.975586	0.999977	translation	sine oculis binding protein homolog [Source:HGNC Symbol;Acc:HGNC:29256]
ENSG00000174007	CEP19	-0.678603	0.999861	-0.0438246	0.999977	-0.669247	-0.669247	0.0131001	0.999754	0.690081	0.999977	translation	centrosomal protein 19 [Source:HGNC Symbol;Acc:HGNC:28209]
ENSG00000240583	AQP1	-0.426117	0.999861	0.343544	0.999977	-0.669135	-0.669135	0.0132632	0.999754	0.898409	0.999977	translation	aquaporin 1 (Colton blood group) [Source:HGNC Symbol;Acc:HGNC:633]
ENSG00000127589	TUBBP1	-0.627756	0.999861	0.176849	0.999977	-0.63591	-0.63591	0.0118102	0.999754	0.319658	0.999977	translation	tubulin beta pseudogene 1 [Source:HGNC Symbol;Acc:HGNC:12414]
ENSG00000100167	SEPTIN3	-0.797735	0.999861	-0.280566	0.999977	-0.621878	-0.797735	0.0384094	0.999754	0.825141	0.999977	translation	septin 3 [Source:HGNC Symbol;Acc:HGNC:10750]
ENSG00000260063	RP5-968P14.2	-0.534415	0.999861	-0.195214	0.999977	-0.581446	-0.581446	0.0412419	0.999754	-0.65076	0.999977	translation	novel transcript, antisense to ARID1A
ENSG00000269934	RP5-1139B12.3	-0.546179	0.999861	0.159446	0.999977	-0.572556	-0.572556	0.0185544	0.999754	0.881416	0.999977	translation	novel transcript, antisense to OBSCN
ENSG00000084110	HAL	-0.547039	0.999861	0.422819	0.999977	-0.564344	-0.564344	0.0384094	0.999754	0.752094	0.999977	translation	histidine ammonia-lyase [Source:HGNC Symbol;Acc:HGNC:4806]
ENSG00000162738	VANGL2	-0.0936379	0.999861	0.490258	0.999977	-0.552158	-0.552158	0.0264439	0.999754	0.584479	0.999977	translation	VANGL planar cell polarity protein 2 [Source:HGNC Symbol;Acc:HGNC:15511]
ENSG00000128610	FEZF1	-0.592164	0.999861	-0.281242	0.999977	-0.541351	-0.541351	0.0244273	0.999754	0.518452	0.999977	translation	FEZ family zinc finger 1 [Source:HGNC Symbol;Acc:HGNC:22788]
ENSG00000283667	AC009802.1	-0.53514	0.999861	-0.0206044	0.999977	-0.529955	-0.529955	0.00387014	0.999754	0.665825	0.999977	translation	novel transcript, antisense to SERPINB8
ENSG00000119514	GALNT12	-0.447819	0.999861	-0.122846	0.999977	-0.528394	-0.528394	0.027702	0.999754	-0.372133	0.999977	translation	polypeptide N-acetylgalactosaminyltransferase 12 [Source:HGNC Symbol;Acc:HGNC:19877]
ENSG00000180044	C3orf80	-0.456178	0.999861	0.269082	0.999977	-0.519752	-0.519752	0.024221	0.999754	1.27032	0.999977	translation	chromosome 3 open reading frame 80 [Source:HGNC Symbol;Acc:HGNC:40048]
ENSG00000148090	AUH	0.520835	0.999861	0.151245	0.999977	0.514043	0.514043	0.0491809	0.999754	0.0748017	0.999977	translation	AU RNA binding methylglutaconyl-CoA hydratase [Source:HGNC Symbol;Acc:HGNC:890]
ENSG00000018280	SLC11A1	0.50948	0.999861	0.167389	0.999977	0.514334	0.514334	0.0339079	0.999754	0.476412	0.999977	translation	solute carrier family 11 member 1 [Source:HGNC Symbol;Acc:HGNC:10907]
ENSG00000258427	RBM8B	0.537527	0.999861	0.0225609	0.999977	0.535077	0.535077	0.041679	0.999754	-0.276256	0.999977	translation	RNA binding motif protein 8B pseudogene [Source:HGNC Symbol;Acc:HGNC:13426]
ENSG00000254901	MEF2BNB	0.484935	0.999861	-0.118358	0.999977	0.540144	0.540144	0.0426137	0.999754	-0.965886	0.999977	translation	BLOC-1 related complex subunit 8 [Source:HGNC Symbol;Acc:HGNC:37247]
ENSG00000100298	APOBEC3H	0.704459	0.999861	0.213119	0.999977	0.542455	0.542455	0.0271763	0.999754	-0.657622	0.999977	translation	apolipoprotein B mRNA editing enzyme catalytic subunit 3H [Source:HGNC Symbol;Acc:HGNC:24100]
ENSG00000105327	BBC3	0.564597	0.999861	0.134088	0.999977	0.55537	0.55537	0.0060043	0.999754	-0.652309	0.999977	translation	BCL2 binding component 3 [Source:HGNC Symbol;Acc:HGNC:17868]
ENSG00000180573	HIST1H2AC	0.570815	0.999861	0.0657374	0.999977	0.594825	0.594825	0.0244069	0.999754	0.725686	0.999977	translation	H2A clustered histone 6 [Source:HGNC Symbol;Acc:HGNC:4733]
ENSG00000243927	MRPS6	0.682415	0.999861	0.40983	0.999977	0.600335	0.600335	0.022841	0.999754	-0.636511	0.999977	translation	mitochondrial ribosomal protein S6 [Source:HGNC Symbol;Acc:HGNC:14051]
ENSG00000186517	ARHGAP30	0.482495	0.999861	-0.316537	0.999977	0.615866	0.615866	0.0329233	0.999754	-0.872869	0.999977	translation	Rho GTPase activating protein 30 [Source:HGNC Symbol;Acc:HGNC:27414]
ENSG00000184378	ACTRT3	0.436314	0.999861	-0.316005	0.999977	0.665251	0.665251	0.00830936	0.999754	-0.852741	0.999977	translation	actin related protein T3 [Source:HGNC Symbol;Acc:HGNC:24022]
ENSG00000168899	VAMP5	0.71501	0.999861	0.06158	0.999977	0.686876	0.686876	0.023729	0.999754	-1.16858	0.999977	translation	vesicle associated membrane protein 5 [Source:HGNC Symbol;Acc:HGNC:12646]
ENSG00000238058	RP11-432J22.2	0.508955	0.999861	-0.27575	0.999977	0.690385	0.690385	0.023571	0.999754	-0.901243	0.999977	translation	novel transcript
ENSG00000186976	EFCAB6	0.735173	0.999861	-0.0699118	0.999977	0.73095	0.73095	0.00513462	0.999754	0.825193	0.999977	translation	EF-hand calcium binding domain 6 [Source:HGNC Symbol;Acc:HGNC:24204]
ENSG00000248278	SUMO2P17	0.692032	0.999861	-0.161436	0.999977	0.738177	0.738177	0.00303773	0.999754	-1.25558	0.999977	translation	SUMO2 pseudogene 17 [Source:HGNC Symbol;Acc:HGNC:49358]
ENSG00000229637	PRAC2	0.626644	0.999861	-0.564991	0.999977	0.763243	0.763243	0.0254699	0.999754	-1.94221	0.999977	translation	PRAC2 small nuclear protein [Source:HGNC Symbol;Acc:HGNC:30143]
ENSG00000152292	SH2D6	0.77447	0.999861	-0.0635614	0.999977	0.77256	0.77256	0.0332115	0.999754	0.0711589	0.999977	translation	SH2 domain containing 6 [Source:HGNC Symbol;Acc:HGNC:30439]
ENSG00000234513	AC073072.7	0.789349	0.999861	-0.10301	0.999977	0.797863	0.797863	0.0214778	0.999754	-0.468352	0.999977	translation	ribosomal protein S26 (RPS26) pseudogene
ENSG00000269019	AC005932.1	0.991464	0.999861	0.340828	0.999977	0.812356	0.812356	0.0315249	0.999754	-1.16135	0.999977	translation	HOMER3 antisense RNA 1 [Source:HGNC Symbol;Acc:HGNC:53775]
ENSG00000273443	RP11-54O7.18	0.831534	0.999861	0.0596766	0.999977	0.820461	0.820461	0.0155577	0.999754	-0.319133	0.999977	translation	novel transcript
ENSG00000269843	CTC-490E21.10	0.78456	0.999861	-0.425629	0.999977	0.839082	0.839082	0.0222994	0.999754	-0.909675	0.999977	translation	novel transcript
ENSG00000226690	AC005281.1	0.667212	0.999861	-0.226649	0.999977	0.857767	0.857767	0.0264963	0.999754	-0.807758	0.999977	translation	novel protein
ENSG00000270820	RP11-355B11.2	0.944977	0.999861	0.257571	0.999977	0.904388	0.904388	0.00514585	0.999754	-0.401242	0.999977	translation	novel transcript, antisense to XPO1
ENSG00000101096	NFATC2	0.219551	0.999861	-1.09687	0.999977	0.933115	0.933115	0.0229296	0.999754	-1.3999	0.999977	translation	nuclear factor of activated T cells 2 [Source:HGNC Symbol;Acc:HGNC:7776]
ENSG00000213237	AC008155.1	0.138427	0.999861	-0.63162	0.999977	0.939301	0.939301	0.0198775	0.999754	-0.719823	0.999977	translation	prothymosin alpha pseudogene 10 [Source:HGNC Symbol;Acc:HGNC:53978]
ENSG00000224609	HSD52	0.258549	0.999861	-0.48766	0.999977	0.995768	0.995768	0.00660159	0.999754	-0.605434	0.999977	translation	novel transcript
ENSG00000277369	RP11-486I11.2	1.06837	0.999861	0.173141	0.999977	1.01925	1.01925	0.00841389	0.999754	-1.13577	0.999977	translation	novel transcript
ENSG00000236942	RP11-6B6.3	0.675023	0.999861	-0.896522	0.999977	1.05257	1.05257	0.00216199	0.999754	-1.81587	0.999977	translation	GABA(A) receptor-associated protein (GABARAP) pseudogene
ENSG00000159915	ZNF233	1.04679	0.999861	-0.297771	0.999977	1.05358	1.05358	0.0185094	0.999754	-0.354083	0.999977	translation	zinc finger protein 233 [Source:HGNC Symbol;Acc:HGNC:30946]
ENSG00000286369	AP002813.1	0.616796	0.999861	-0.753025	0.999977	1.06151	1.06151	0.00847085	0.999754	-1.18433	0.999977	translation	novel transcript
ENSG00000235472	EIF4A1P7	1.05868	0.999861	0.322662	0.999977	1.0688	1.0688	0.00376196	0.999754	0.401801	0.999977	translation	eukaryotic translation initiation factor 4A1 pseudogene 7 [Source:HGNC Symbol;Acc:HGNC:37926]
ENSG00000206113	RP11-503N18.1	0.922383	0.999861	-0.433422	0.999977	1.09148	1.09148	0.0209073	0.999754	-1.55674	0.999977	translation	cilia and flagella associated protein 99 [Source:HGNC Symbol;Acc:HGNC:51180]
ENSG00000127184	COX7C	1.04232	0.999861	0.508887	0.999977	1.09406	1.09406	0.00155846	0.999754	1.05261	0.999977	translation	cytochrome c oxidase subunit 7C [Source:HGNC Symbol;Acc:HGNC:2292]
ENSG00000267277	CTD-2342J14.6	1.06191	0.999861	0.207458	0.999977	1.09637	1.09637	0.00278811	0.999754	0.982602	0.999977	translation	novel transcript, antisense to SWSAP1
ENSG00000242220	TCP10L	1.06371	0.999861	0.318586	0.999977	1.09645	1.09645	0.00753907	0.999754	0.804142	0.999977	translation
ENSG00000262188	RP11-353N14.4	1.22834	0.999861	0.0512143	0.999977	1.23443	1.23443	0.00387014	0.999754	0.573609	0.999977	translation	long intergenic non-protein coding RNA 1978 [Source:HGNC Symbol;Acc:HGNC:52806]
ENSG00000231050	RP1-140A9.1	1.00315	0.999861	-0.450569	0.999977	1.27676	1.27676	0.0156221	0.999754	-1.7236	0.999977	translation	novel transcript
ENSG00000235957	COX7CP1	1.32335	0.999861	-0.00624798	0.999977	1.32153	1.32153	0.00167551	0.999754	1.09993	0.999977	translation	cytochrome c oxidase subunit 7C pseudogene 1 [Source:HGNC Symbol;Acc:HGNC:2293]
ENSG00000124399	RP11-663P9.2	1.05572	0.999861	-0.690686	0.999977	1.33389	1.33389	0.00474957	0.999754	-1.5101	0.999977	translation	NADH:ubiquinone oxidoreductase subunit B4 pseudogene 12 [Source:HGNC Symbol;Acc:HGNC:45260]
ENSG00000260475	RP11-85A1.3	0.727791	0.999861	-1.1338	0.999977	1.37095	1.37095	0.00567293	0.999754	-1.89952	0.999977	translation	novel transcript				0.005897
ENSG00000186198	SLC51B	1.24113	0.999861	-0.923892	0.999977	1.46096	1.46096	0.0238315	0.999754	-1.80456	0.999977	translation	solute carrier family 51 beta subunit [Source:HGNC Symbol;Acc:HGNC:29956]				0.00753907

## Sheet: Table2
	apvEff	apvRvmP
HCT116
TNFRSF12A	-0.304679	0.0281709
VIM	-0.36857	0.0330698
CAPG	-0.168085	0.0290435
CA2	-0.430497	0.0392048
TGFB3	-0.108337	0.0284211
EGR2	-0.763466	0.0153414
NR4A1	-0.0576754	0.0417595
FBLN5	-0.382175	0.0338904
HCT15
ECM1	-0.0221053	0.034346
CHRNB1	-0.280426	0.0397047
NR2F1	-0.385939	0.0286998
