# Supplementary material for: KSR1- and ERK-dependent translational regulation of the epithelial-to-mesenchymal transition
Source: eLife. 2021 May 10;10:e66608. doi: 10.7554/eLife.66608 (PMC8195604; doi:10.7554/eLife.66608)
Supplement: Supplementary file 1. — Translational efficiency of mRNAs (58 decreased; 40 increased) upon KSR1 knockdown in HCT116 and HCT15 cells, related to Figure 1B. [file elife-66608-supp1.xlsx]

## Sheet: Sheet1
Supplementary File 1: Genes translationally altered by KSR1.
Sl.No	Gene_Symbol	translation.apvEff	apvRvmP
1	RN7SKP173	-2.11522	0.0105262
2	AC016074.2	-1.92782	0.0222994
3	FKBP2	-1.62511	0.000661038
4	RP11-89K21.1	-1.60948	0.0133174
5	GLT8D2	-1.52775	0.0257782
6	AC034139.1	-1.41424	0.041679
7	EPSTI1	-1.40484	0.00365629
8	RUNX3	-1.38843	0.0241003
9	RP11-462G12.1	-1.37949	0.00847085
10	KIAA1377	-1.26311	0.0254887
11	AC074289.1	-1.25951	0.00976027
12	MURC	-1.24551	0.00623716
13	RP11-119F7.5	-1.24276	0.0143565
14	WNT9A	-1.23082	0.0258682
15	RP11-417L19.4	-1.20771	0.0180544
16	GRM2	-1.19239	0.0206534
17	DLL1	-1.17705	0.0107318
18	CTD-2619J13.17	-1.12141	0.00437645
19	RNF112	-1.02747	0.0112364
20	HOXA10-AS	-1.02131	0.00691426
21	HOXC8	-1.01721	0.0233234
22	AC245140.3	-1.00919	0.0315249
23	FRMPD1	-0.994796	0.0204109
24	LRRN4	-0.948592	0.0115648
25	COL13A1	-0.93162	0.005897
26	CTC-453G23.8	-0.925847	0.00440875
27	PTPRN2	-0.919824	0.00291748
28	BEND3P3	-0.91231	0.0106438
29	RP11-448G15.3	-0.905898	0.0222942
30	MT-TF	-0.898581	0.0220672
31	MRC2	-0.884136	0.0250392
32	P2RY1	-0.873495	0.0190791
33	MGAT2	-0.868089	0.0228113
34	LHX9	-0.864379	0.0121787
35	MTMR9	-0.821179	0.030426
36	USP2	-0.811722	0.0113046
37	IFIT3	-0.808722	0.0212959
38	RP11-218C14.8	-0.789319	0.00504223
39	ABCG2	-0.764955	0.00918365
40	EGR2	-0.763466	0.0153414
41	RP11-713C19.2	-0.762225	0.0337767
42	ZFP2	-0.748684	0.00889647
43	RASD1	-0.727155	0.024515
44	RP11-757G1.6	-0.701122	0.0315178
45	KIAA0825	-0.695595	0.0144602
46	SOBP	-0.691996	0.0353668
47	CEP19	-0.669247	0.0131001
48	AQP1	-0.669135	0.0132632
49	TUBBP1	-0.63591	0.0118102
50	SEPTIN3	-0.621878	0.0384094
51	RP5-968P14.2	-0.581446	0.0412419
52	RP5-1139B12.3	-0.572556	0.0185544
53	HAL	-0.564344	0.0384094
54	VANGL2	-0.552158	0.0264439
55	FEZF1	-0.541351	0.0244273
56	AC009802.1	-0.529955	0.00387014
57	GALNT12	-0.528394	0.027702
58	C3orf80	-0.519752	0.024221
59	AUH	0.514043	0.0491809
60	SLC11A1	0.514334	0.0339079
61	RBM8B	0.535077	0.041679
62	MEF2BNB	0.540144	0.0426137
63	APOBEC3H	0.542455	0.0271763
64	BBC3	0.55537	0.0060043
65	HIST1H2AC	0.594825	0.0244069
66	MRPS6	0.600335	0.022841
67	ARHGAP30	0.615866	0.0329233
68	ACTRT3	0.665251	0.00830936
69	VAMP5	0.686876	0.023729
70	RP11-432J22.2	0.690385	0.023571
71	EFCAB6	0.73095	0.00513462
72	SUMO2P17	0.738177	0.00303773
73	PRAC2	0.763243	0.0254699
74	SH2D6	0.77256	0.0332115
75	AC073072.7	0.797863	0.0214778
76	AC005932.1	0.812356	0.0315249
77	RP11-54O7.18	0.820461	0.0155577
78	CTC-490E21.10	0.839082	0.0222994
79	AC005281.1	0.857767	0.0264963
80	RP11-355B11.2	0.904388	0.00514585
81	NFATC2	0.933115	0.0229296
82	AC008155.1	0.939301	0.0198775
83	HSD52	0.995768	0.00660159
84	RP11-486I11.2	1.01925	0.00841389
85	RP11-6B6.3	1.05257	0.00216199
86	ZNF233	1.05358	0.0185094
87	AP002813.1	1.06151	0.00847085
88	EIF4A1P7	1.0688	0.00376196
89	RP11-503N18.1	1.09148	0.0209073
90	COX7C	1.09406	0.00155846
91	CTD-2342J14.6	1.09637	0.00278811
92	TCP10L	1.09645	0.00753907
93	RP11-353N14.4	1.23443	0.00387014
94	RP1-140A9.1	1.27676	0.0156221
95	COX7CP1	1.32153	0.00167551
96	RP11-663P9.2	1.33389	0.00474957
97	RP11-85A1.3	1.37095	0.00567293
98	SLC51B	1.46096	0.0238315
