# Supplementary material for: KSR1- and ERK-dependent translational regulation of the epithelial-to-mesenchymal transition
Source: eLife. 2021 May 10;10:e66608. doi: 10.7554/eLife.66608 (PMC8195604; doi:10.7554/eLife.66608)
Supplement: Supplementary file 2. — GSEA for the subset of translationally controlled genes involved in ‘Hallmark EMT signature’, ‘Jechlinger EMT Up’, and ‘Gotzmann EMT up’ in a KSR1-dependent manner. [file elife-66608-supp2.xlsx]

## Sheet: Sheet1
Supplementary File 2: KSR1-dependent genes predicted in mesenchymal-up signature identified by GSEA.
	apvEff	apvRvmP
HCT116
TNFRSF12A	-0.304679	0.0281709
VIM	-0.36857	0.0330698
CAPG	-0.168085	0.0290435
CA2	-0.430497	0.0392048
TGFB3	-0.108337	0.0284211
EGR2	-0.763466	0.0153414
NR4A1	-0.0576754	0.0417595
FBLN5	-0.382175	0.0338904
HCT15
ECM1	-0.0221053	0.034346
CHRNB1	-0.280426	0.0397047
NR2F1	-0.385939	0.0286998
