# Supplementary figures and images for: KSR1- and ERK-dependent translational regulation of the epithelial-to-mesenchymal transition
Source: eLife journal article supplement (doi:10.7554/elife.66608), 2021-05-10

**1A****HCT116**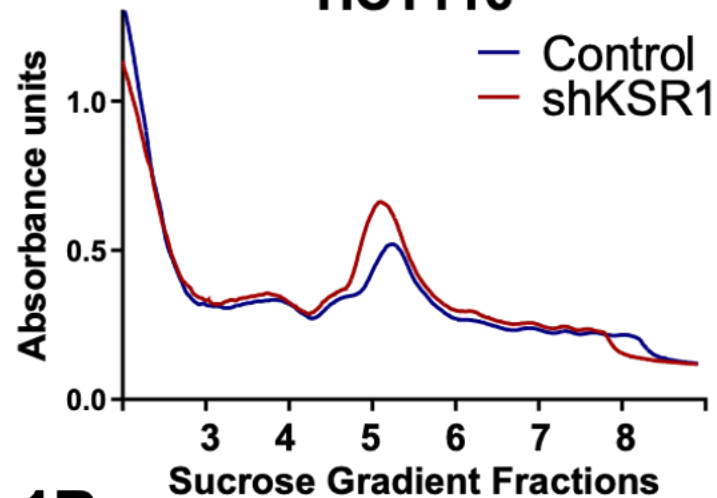**2A****HCT116**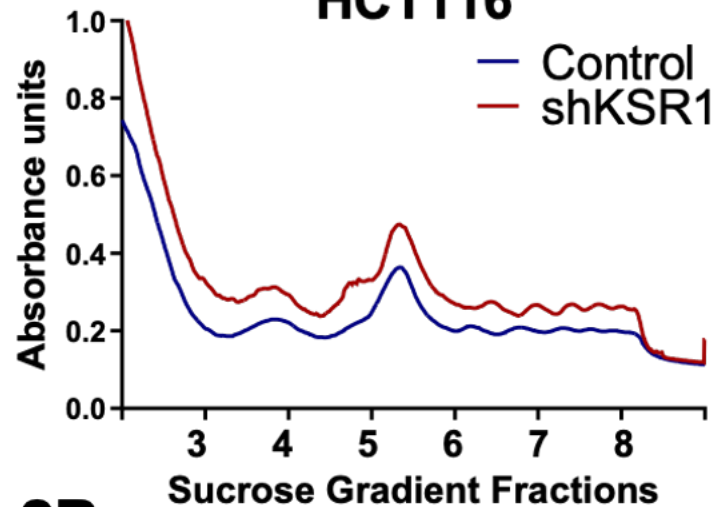**3A****HCT116**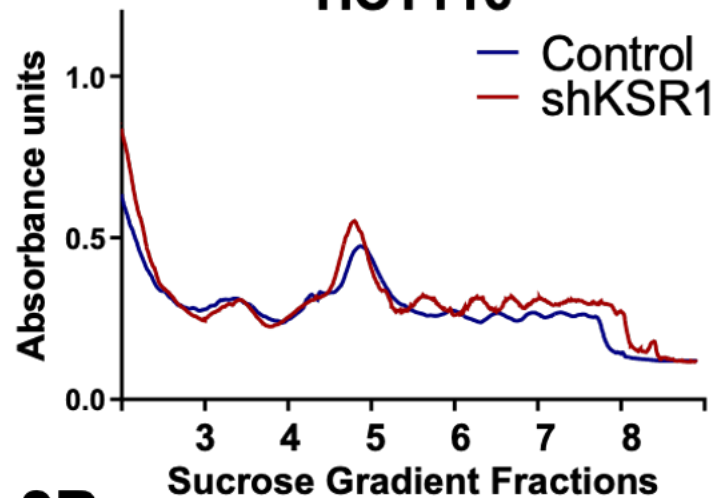**1B****HCT15**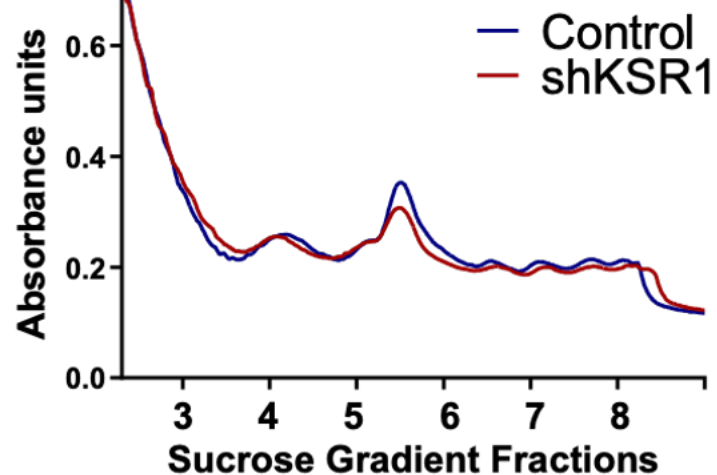**2B****HCT15**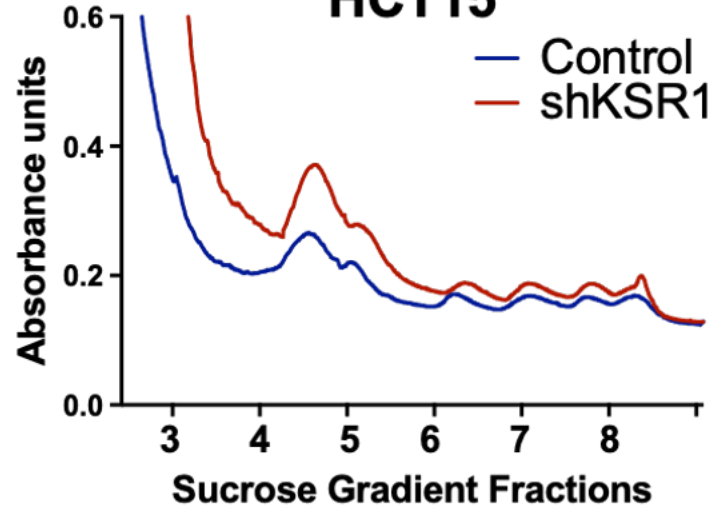**3B****HCT15**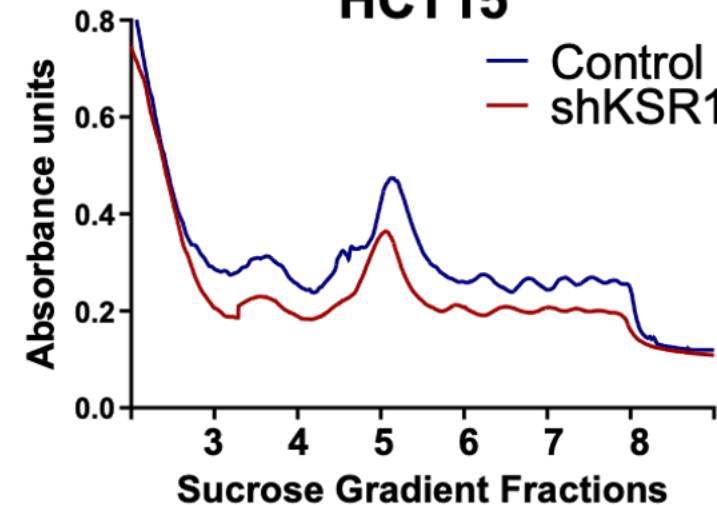

Supplement: supp [file elife-66608-supp-v1.zip]

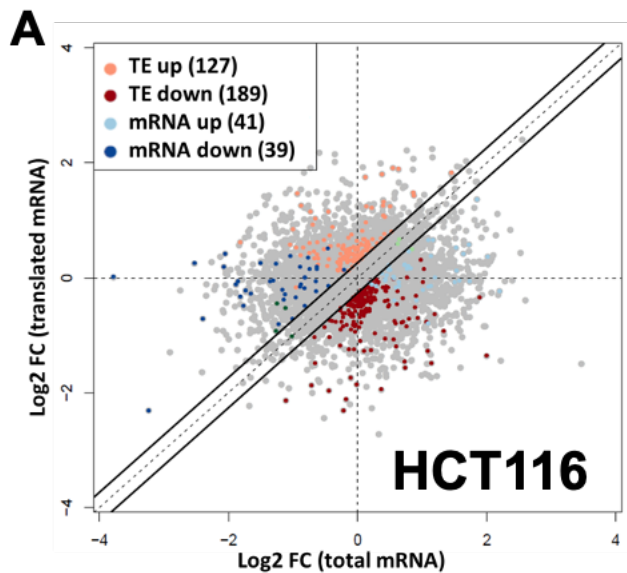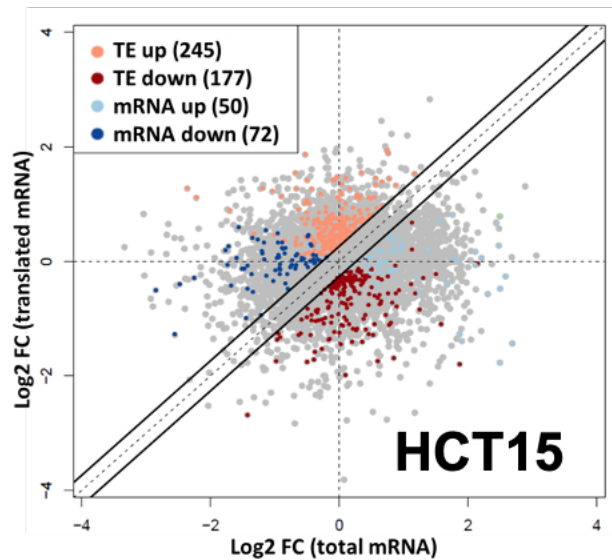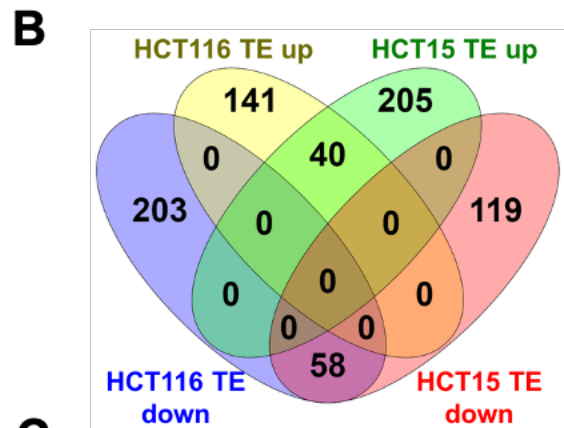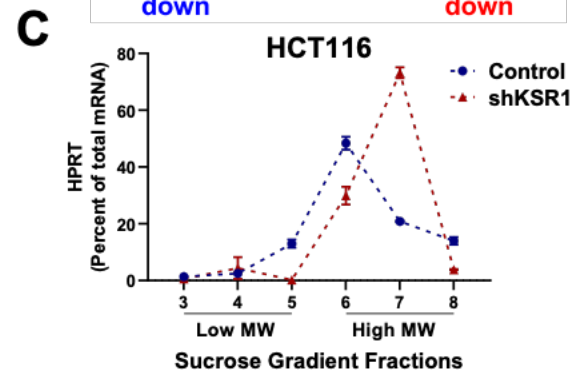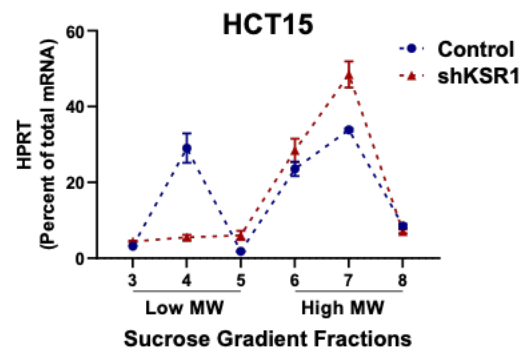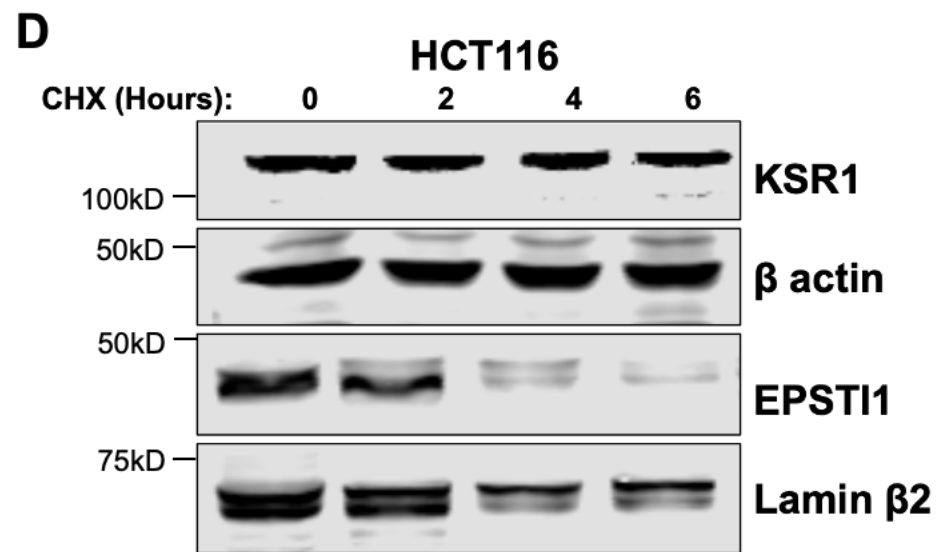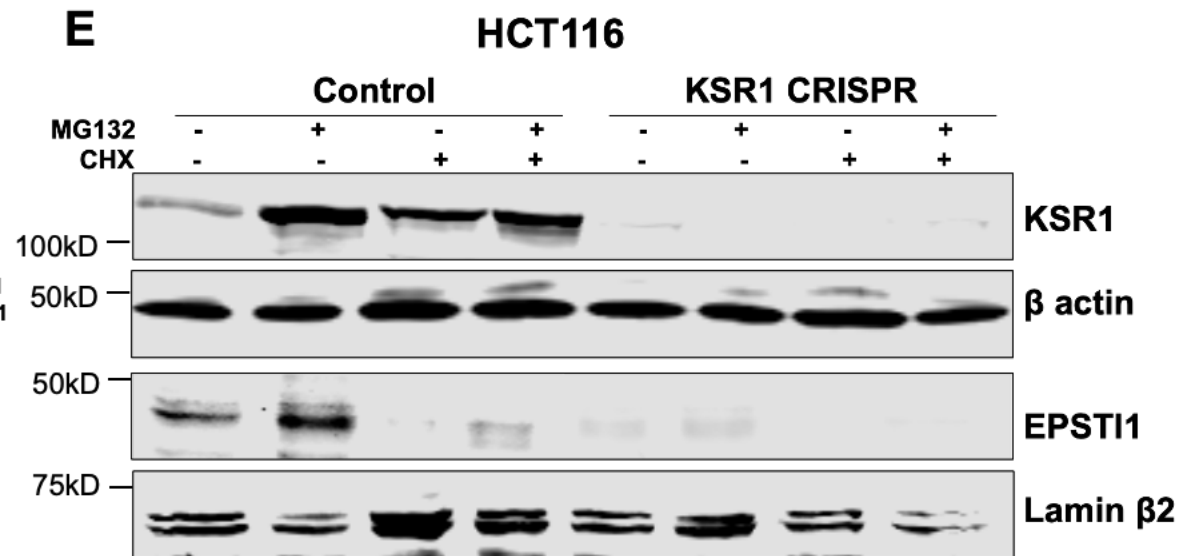

Supplement: supp [file elife-66608-supp-v1.zip]

**A**

HCT116  
CON KSR1 CRISPR

#1 #2

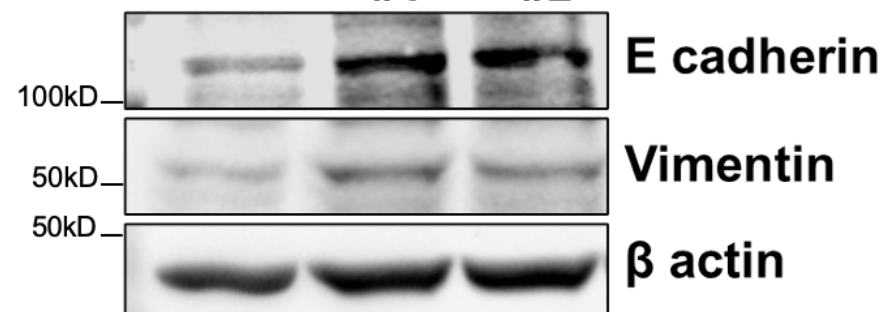**B**

SLUG mRNA

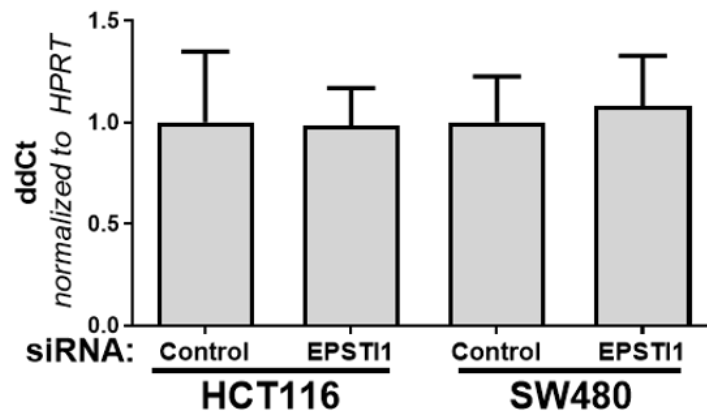**C**

HCT116

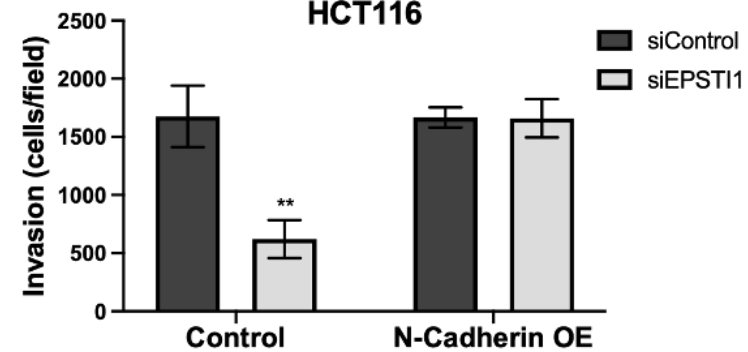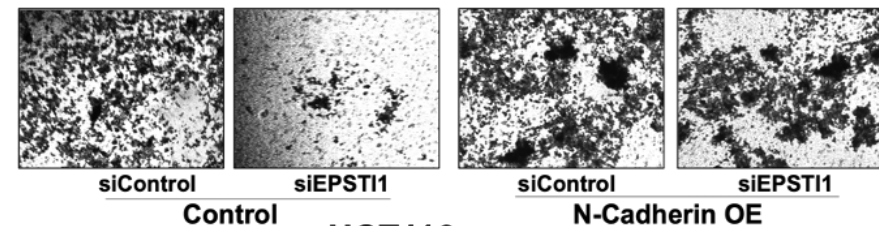

HCT116  
CON KSR1 CRISPR

MSCV-KSR1

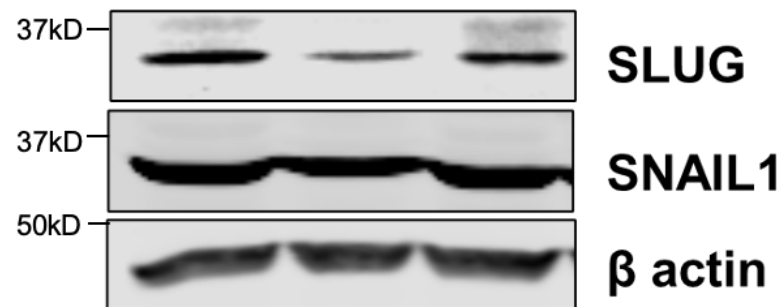

ZEB1 mRNA

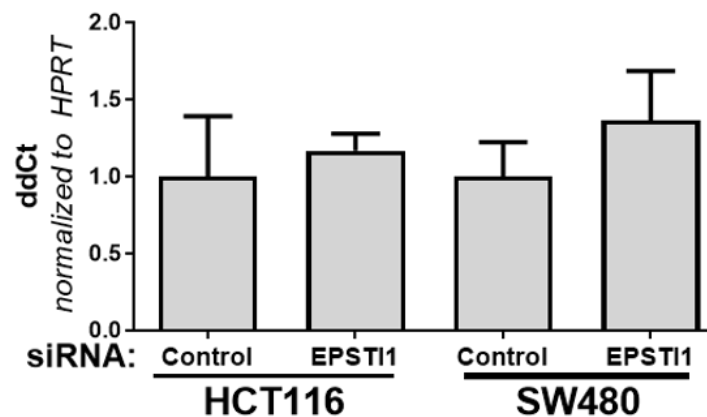**D**

HCT116

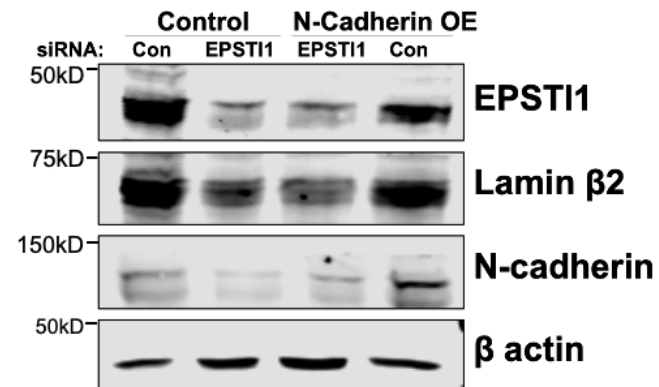

Supplement: supp [file elife-66608-supp-v1.zip]

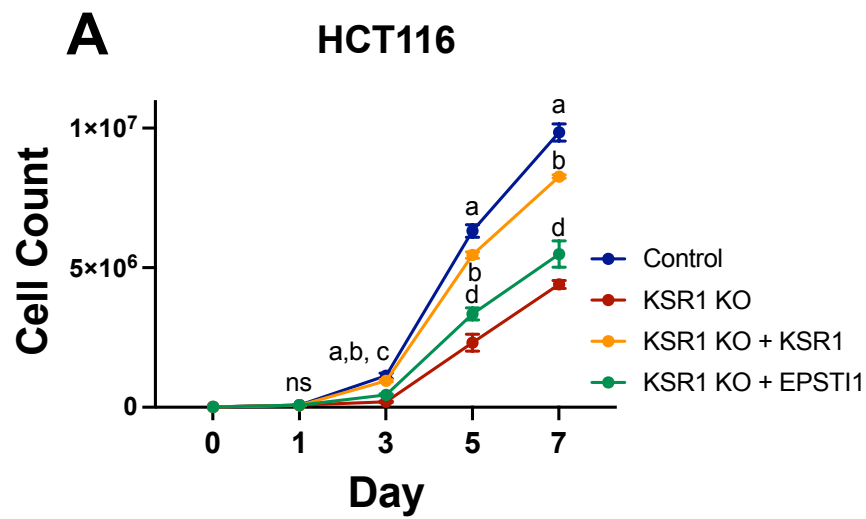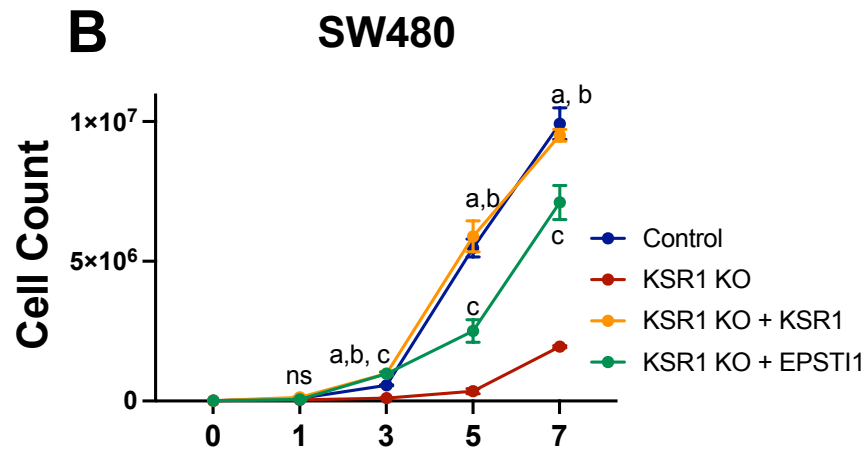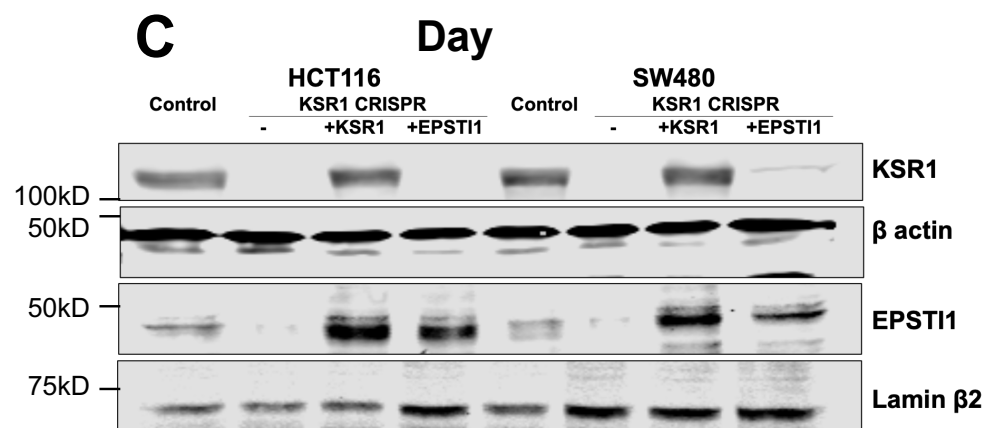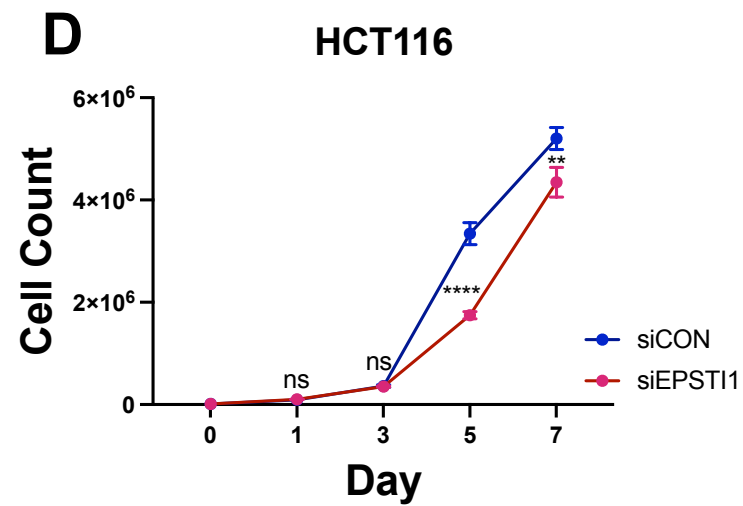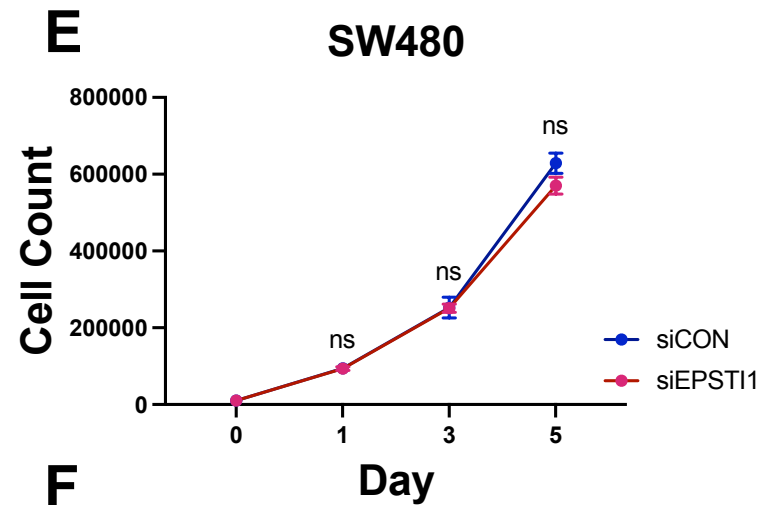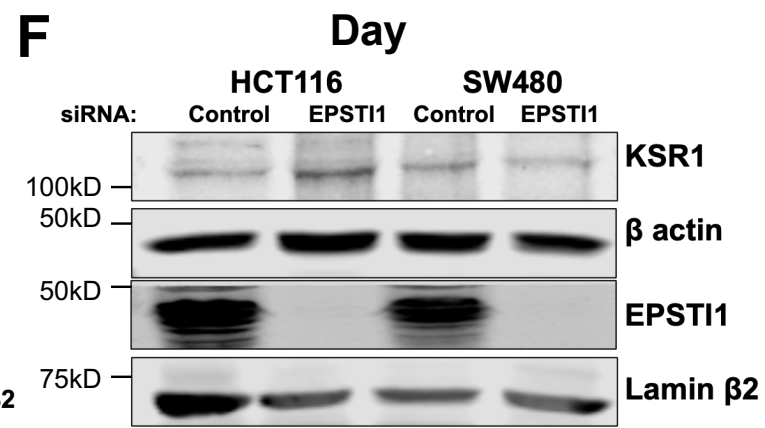

Supplement: supp [file elife-66608-supp-v1.zip]
